# Supplementary material for: Bio-based poly(hydroxyurethane) glues for metal substrates
Source: Royal Society of Chemistry journal article supplement (doi:10.1039/c8py00281a), 2018-01-01
Supplement: c8py00281a1.pdf [file c8py00281a1.pdf]

## Supporting information

### Bio-based poly(hydroxyurethane) glues for metal substrates.

Satyannarayana Panchireddy, Bruno Grignard, Jean-Michel Thomassin, Christine Jerome, Christophe Detrembleur\*

Center for Education and Research on Macromolecules (CERM), CESAM Research Unit, University of Liège, allée du 6 août, Building B6A, Agora Square, 4000 Liège, Belgium

\* to whom correspondence should be addressed

---

|             |                                                                                                                                                                                                                                                                                                                   |
|-------------|-------------------------------------------------------------------------------------------------------------------------------------------------------------------------------------------------------------------------------------------------------------------------------------------------------------------|
| Figure S1:  | FTIR spectra of epoxidised soybean oil (ESBO), cyclic carbonated soybean oil (CSBO) and PHU-H (formed from CSBO/HMDA = 1/3.0 at 100 °C for 50 min).                                                                                                                                                               |
| Figure S2:  | FTIR spectra used to determine the influence of mixing time on the conversion of CSBO and HMDA.                                                                                                                                                                                                                   |
| Figure S3:  | Effect of formulation mixing time on the stability of the PHU thermoset films within organic solvents (THF and DMF). A: on the left, formulation mixed for 1 min at 50 °C, B: on the right, formulation mixed for 3 min at 50 °C. The curing conditions were held constant (at 70 °C for 12 h and 4 h at 100 °C). |
| Figure S4:  | FTIR spectra used to highlight the reaction between cyclic carbonate functional fillers and amines (HMDA).                                                                                                                                                                                                        |
| Figure S5:  | Optimisation of PHU and analogous nanocomposite formulations by rheology under solvent free conditions at 100 °C                                                                                                                                                                                                  |
| Figure S6:  | SEM images of PHUs coating reinforced with 5 wt% of (a) cyclic carbonate functional CC-SiO <sub>2</sub> fillers and (b) CC-ZnO fillers.                                                                                                                                                                           |
| Figure S7:  | Water content evolution with time evaluated for PHUs and analogue nanocomposite freestanding films.                                                                                                                                                                                                               |
| Figure S8:  | Equilibrium water content and contact angle measurements of PHU coatings.                                                                                                                                                                                                                                         |
| Figure S9:  | TGA and DTGA of (a) PHU-H (aliphatic), (b) PHU-I (cycloaliphatic) and (c) PHU-M (aromatic) [1-bare PHUs, 2-PHUs reinforced with CC-SiO <sub>2</sub> , 3-PHUs reinforced with CC-ZnO and PHU*-Deriv.weight (%/°C)]                                                                                                 |
| Figure S10: | DSC thermograms of (a) PHU-H (aliphatic), (b) PHU-I (cycloaliphatic) and (c) PHU-M (aromatic) series of PHUs with reinforced fillers of CC-SiO <sub>2</sub> /ZnO [1- pure PHUs, 2-PHUs reinforced with CC-SiO <sub>2</sub> , 3-PHUs reinforced with CC-ZnO]                                                       |
| Table S1:   | Lap shear adhesion strength and failure pattern of bio-based PHU glues.                                                                                                                                                                                                                                           |
| Table S2:   | Adhesive performance of bio-based PHU nanocomposite thermoset glues benchmarked against commercial PU and reported PHUs.                                                                                                                                                                                          |

---

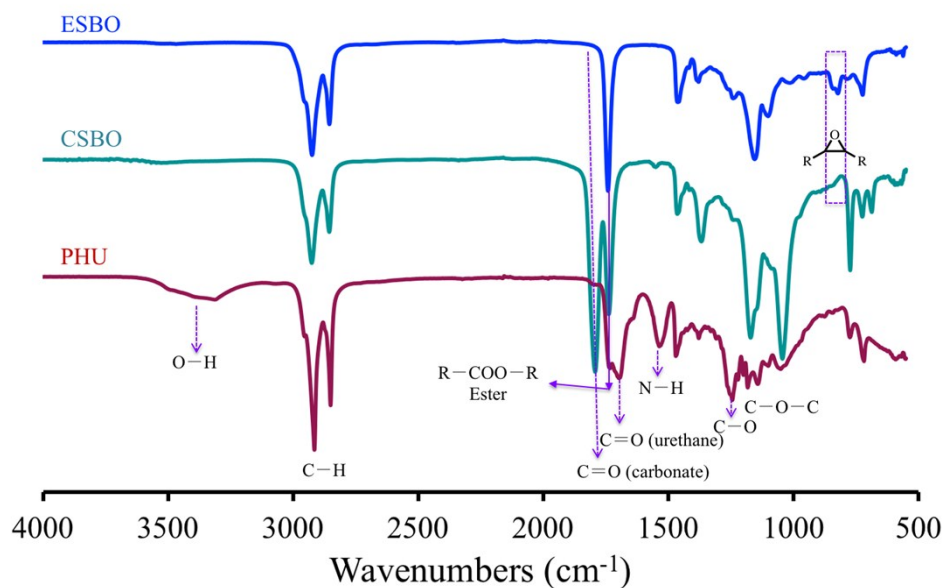

**Figure S1.** FTIR spectra of epoxidised soybean oil (ESBO), cyclic carbonated soybean oil (CSBO) and PHU-H (formed from CSBO/HMDA = 1/3 at 100 °C for 50 min).

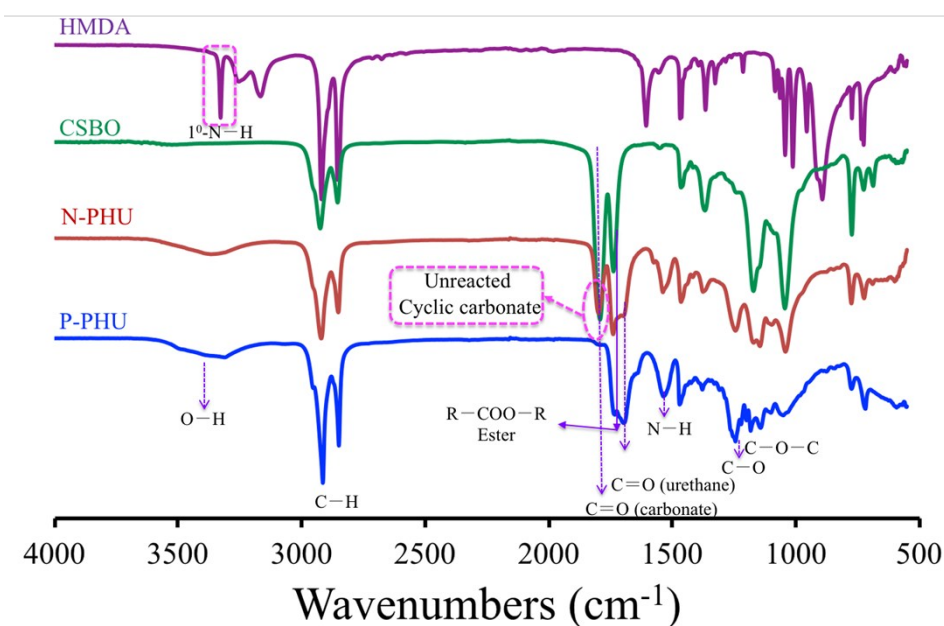

**Figure S2.** FTIR spectra used to determine the influence of mixing time on the conversion. The spectra of hexamethylene diamine (HMDA), cyclic carbonated soybean oil (CSBO), N-PHU (Not properly mixed polyhydroxyurethanes; mixed for 1 min at 50 °C) and P-PHU (properly mixed polyhydroxyurethanes; mixed for 3 min at 50 °C) after curing at 70 °C for 12 h and 100 °C for 4 h.

### Effect of formulation mixing time on the stability of thermosets.

We performed the effect of formulation (CSBO/HMDA) mixing time (thus, A: mixed for 3 min at 50 °C and B: mixed for 1 min at 50 °C) on the stability of the thermosets towards organic solvents (DMF and THF). The samples were prepared by depositing formulations into teflon molds and curing at 70 °C for 12 h and 100 °C for 4 h. The stability of the PHU-thermoset films was performed by immersion in DMF and THF for 10 to 120 minutes (Figure S3). As can be seen, not properly mixed or inhomogeneous thermosets dissolved/broke into pieces due to insufficient mixing time (1 min) to obtain homogeneous formulations. Whereas properly mixed for 3 min, homogeneous thermosets sustain their structural integrity in organic solvents (THF and DMF). This study showed that, the effectively mixed formulations are crucial to obtain high performance materials.

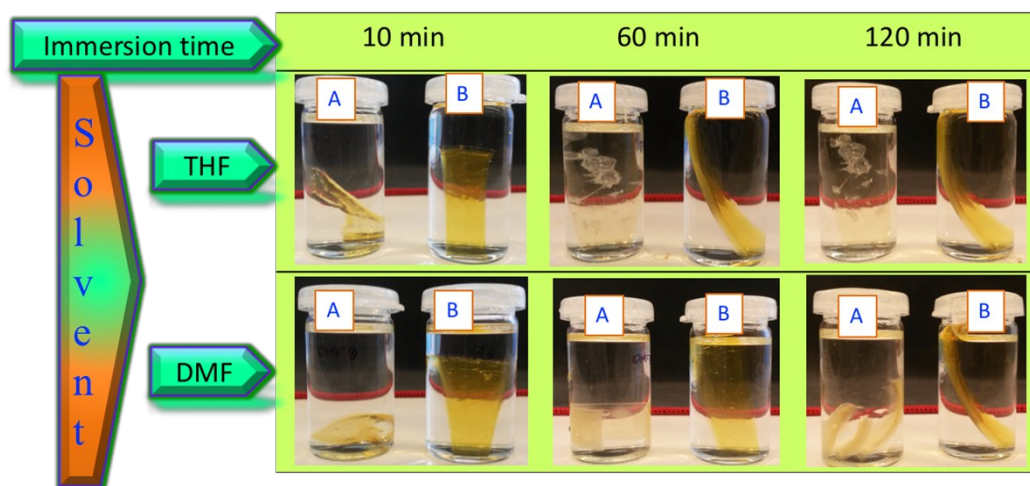

**Figure S3.** Effect of formulation mixing time on the stability of the PHU thermoset films within organic solvents (THF and DMF). **A:** on the left, formulation mixed for 1 min at 50 °C, **B:** on the right, formulation mixed for 3 min at 50 °C. The curing conditions were held constant (at 70 °C for 12 h and 4 h at 100 °C).

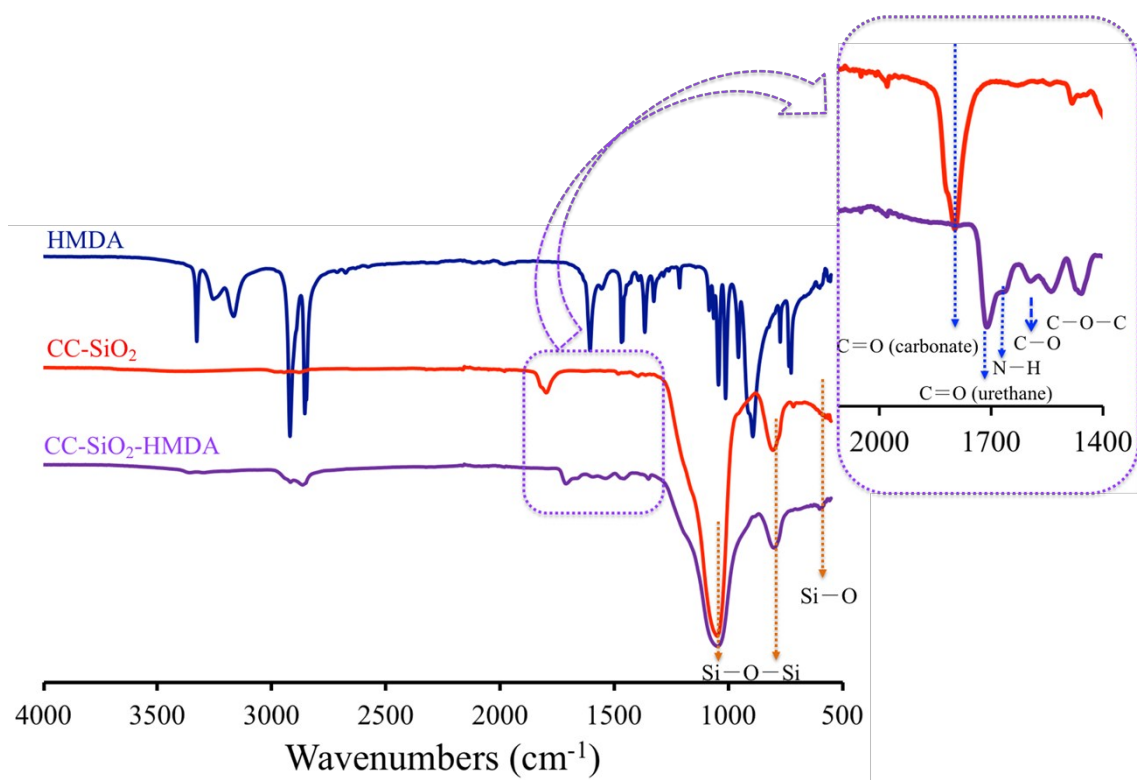

**Figure S4.** FTIR spectra used to highlight the reaction between cyclic carbonate functional fillers and HMDA. Spectra of HMDA, CC-SiO<sub>2</sub> and spectra after reaction between HMDA and CC-SiO<sub>2</sub> (CC-SiO<sub>2</sub>-HMDA) in THF at 60 °C for 30 minutes followed by curing at 70 °C for 12 h and 100 °C for 4 h.

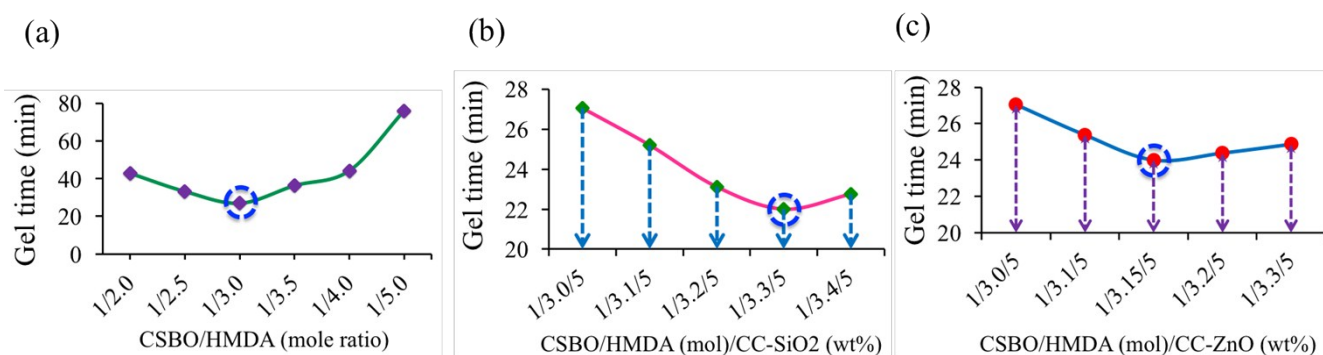

**Figure S5.** Optimisation of PHU and analogous nanocomposite formulations (a) Evolution of the gel time for various CSBO/HMDA molar compositions, (b) Gel time evolution for various CSBO/HMDA/CC-SiO<sub>2</sub> formulations and (c) Gel time evolution for various CSBO/HMDA/CC-ZnO formulations. All formulations were cured under solvent-free conditions at 100 °C and monitored by rheology. Blue star indicates the shortest gel time and best formulation molar ratios (thus, CSBO/HMDA-1/3, CSBO/diamines/CC-SiO<sub>2</sub> 1/3.3/5 (mol/mol/wt%) and CSBO/diamines/CC-ZnO 1/3.15/5 (mol/mol/wt%).

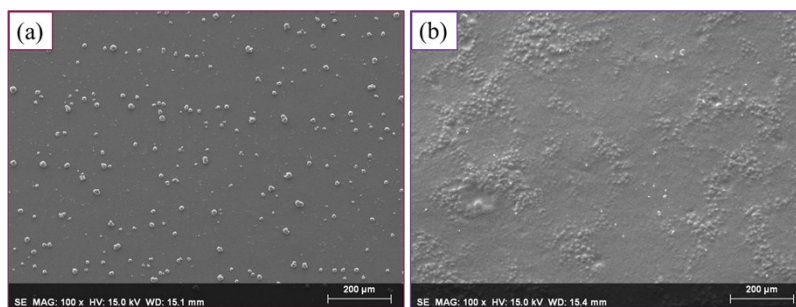

**Figure S6.** SEM images of PHUs coating reinforced with 5 wt% of (a) cyclic carbonate functional CC-SiO<sub>2</sub> fillers and (b) CC-ZnO fillers.

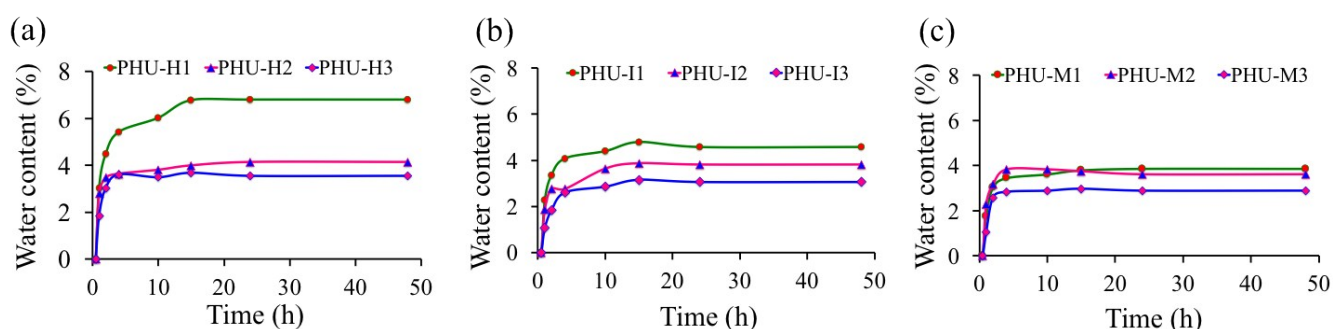

**Figure S7.** Water content evolution with time evaluated for PHUs and analogue nanocomposite freestanding films [dimensions: 0.5 cm (l) × 0.5 cm (t) × 0.5 cm (w)] prepared from [CSBO]/[diamine] formulations with 5wt% CC-SiO<sub>2</sub> or CC-ZnO. (a) PHU-H (CSBO/HMDA/fillers), (b) PHU-M (CSBO/MXDA/fillers), (c) PHU-I (CSBO/IPDA/fillers) and [PHU-H1, PHU-M1 and PHU-I1: unfilled PHUs, PHU-H2, PHU-M2 and PHU-I2: PHUs reinforced with 5wt% CC-SiO<sub>2</sub>; PHU-H3, PHU-M3 and PHU-I3: PHUs reinforced with 5wt% CC-ZnO].

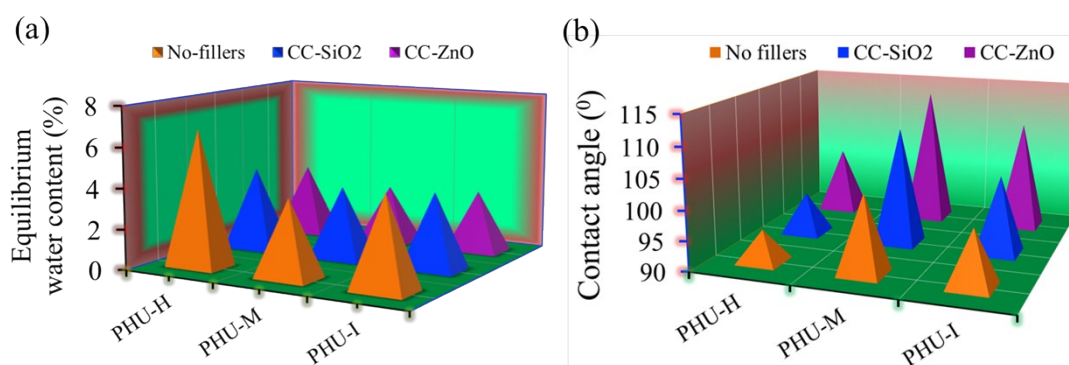

**Figure S8.** (a) Equilibrium water content (after 48 h of immersion) of PHUs and analogue nanocomposite freestanding films [dimensions: 0.5 cm (l) × 0.5 cm (t) × 0.5 cm (w)] prepared from [CSBO]/[diamine] formulations with 5wt% CC-SiO<sub>2</sub> or CC-ZnO. PHU-H (CSBO/HMDA/fillers), PHU-M (CSBO/MXDA/fillers), and PHU-I (CSBO/IPDA/fillers) and (b) Water contact angle measurements of PHU coatings.



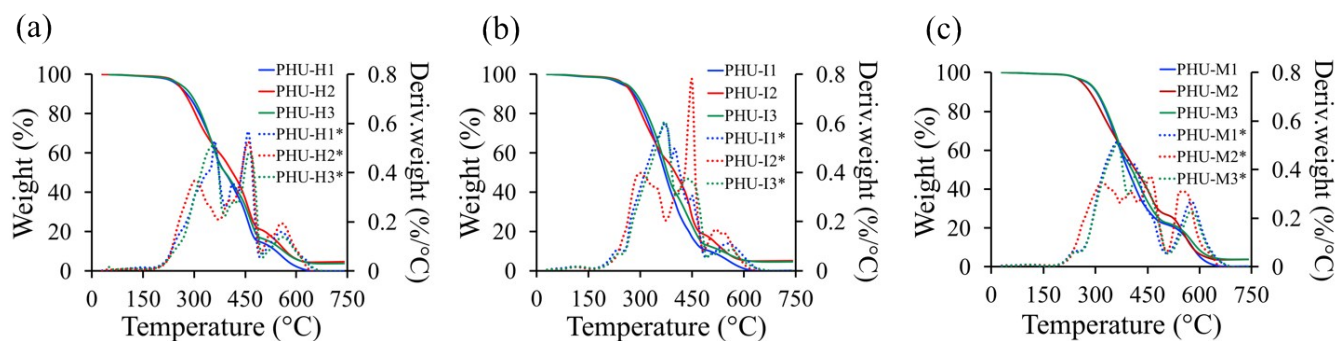

**Figure S9:** TGA and DTGA of (a) PHU-H (aliphatic), (b) PHU-I (cycloaliphatic) and (c) PHU-M (aromatic) [1: PHUs, 2: PHUs reinforced with 5 wt% CC-SiO<sub>2</sub>, 3: PHUs reinforced with 5 wt% CC-ZnO and PHU\*-Deriv.weight (%/°C)].

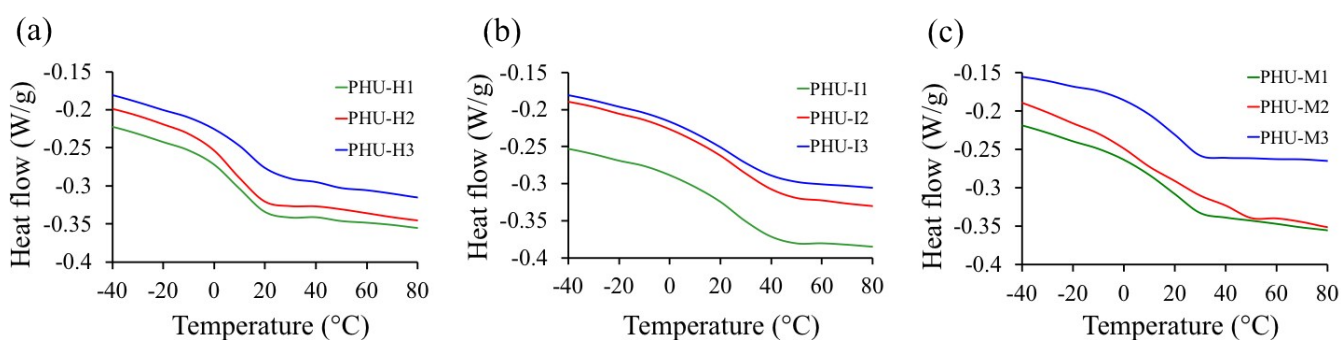

**Figure S10:** DSC thermograms of (a) PHU-H (from aliphatic amine), (b) PHU-I (from cycloaliphatic amine) and (c) PHU-M (from aromatic amine) and PHUs reinforced with 5 wt% CC-SiO<sub>2</sub> or CC-ZnO [1: PHUs, 2: PHUs reinforced with CC-SiO<sub>2</sub>, 3: PHUs reinforced with CC-ZnO].

**Table S1.** Lap shear adhesion strength and failure pattern of bio-based PHU glues.

| Sample code | Lap shear strength (MPa) | Failure mode | Lap shear strength (MPa) | Failure mode |
|-------------|--------------------------|--------------|--------------------------|--------------|
|             | Al-Al                    |              | SS-SS                    |              |
| PHU-H1      | 6.5 ± 0.49               | C.F          | 4.9 ± 0.12               | C.F          |
| PHU-H2      | 8.8 ± 0.35               | C.F          | 7.9 ± 0.27               | C.F          |
| PHU-H3      | 11.3 ± 0.28              | C.F          | 10.1 ± 0.23              | C.F          |
| PHU-M1      | 6.4 ± 0.33               | C.F          | 6.1 ± 0.49               | C.F          |
| PHU-M2      | 6.9 ± 0.26               | C.F          | 6.4 ± 0.42               | C.F          |
| PHU-M3      | 7.5 ± 0.29               | C.F          | 6.9 ± 0.15               | C.F          |
| PHU-I1      | 3.7 ± 0.54               | C.F          | 3.5 ± 0.04               | C.F          |
| PHU-I2      | 4.6 ± 0.36               | C.F          | 4.4 ± 0.98               | A.F          |
| PHU-I3      | 5.9 ± 0.52               | A.F          | 4.6 ± 0.47               | A.F          |

Bio-based PHU thermoset glues and analogues PHUs reinforced with 5 wt% CC-SiO<sub>2</sub> or CC-ZnO fillers; C.F: Cohesive failure, A.F: Adhesive failure. (PHU-H: aliphatic, PHU-M: aromatic and PHU-I: cyclic aliphatic thermosets). [PHU-H1, PHU-M1 and PHU-I1: unfilled PHUs, PHU-H2, PHU-M2 and PHU-I2: PHUs reinforced with 5wt% CC-SiO<sub>2</sub>; PHU-H3, PHU-M3 and PHU-I3: PHUs reinforced with 5 wt% CC-ZnO].

**Table S2.** Adhesive performance of bio-based PHU nanocomposite thermoset glues compared with commercial PU as well as with reported PHUs.

| Sample code                                       | Cured at 25 °C for 48 h  |              | Cured at 70 °C for 12 h and 100 °C for 4 h |              |
|---------------------------------------------------|--------------------------|--------------|--------------------------------------------|--------------|
|                                                   | Lap shear strength (MPa) | Failure mode | Lap shear strength (MPa)                   | Failure mode |
|                                                   | Al-Al                    |              | SS-SS                                      |              |
| Teromix-6700                                      | 12.5 ± 0.8               | C.F          | 7.2 ± 0.4                                  | C.F          |
| Araldite®2000+                                    | 21.7 ± 0.2               | C.F          | 11.2 ± 0.5                                 | A.F          |
| PHU(M-1) <sup>1</sup> : TMPTC/EDR-148             | 1.9 ± 0.2                | C.F          | 6.5 ± 0.3                                  | C.F          |
| PHU-5C <sup>2</sup> : TMPTC/HMDA/PDMS/C-GPTMS-ZnO | 3.3 ± 0.4                | C.F          | 16.3 ± 1.4                                 | C.F          |
| PHU-H3: CSBO/HMDA/CC-ZnO                          | 2.2 ± 0.9                | C.F          | 11.3 ± 0.28                                | C.F          |

C.F: Cohesive failure and A.F: Adhesive failure

## References:

- 1 A. Cornille, G. Michaud, F. Simon, S. Fouquay, R. Auvergne, B. Boutevin and S. Caillol, *Eur. Polym. J.*, 2016, **84**, 404–420.
- 2 S. Panchireddy, J.-M. Thomassin, B. Grignard, C. Damblon, A. Tatton, C. Jerome and C. Detrembleur, *Polym. Chem.*, 2017, **8**, 5897–5909
